# Supplementary material for: e-Measures: insight into the challenges and opportunities of automating publicly reported quality measures
Source: PubMed Central journal article supplement — J Am Med Inform Assoc. 2013 Jul 5;21(1):181–4. doi: 10.1136/amiajnl-2013-001789 (PMC3912717; doi:10.1136/amiajnl-2013-001789), 2013-07-05
Supplement: amiajnl-2013-001789-s3.pdf [file amiajnl-2013-001789-s3.pdf]

**Web-only Table 1.** Data elements required for TJC core measure VTE-2, Intensive Care Unit Venous Thromboembolism Prophylaxis

|                      |                                                                                                                                                                                                                                                                                                                                                                                                                                                                                                                                                                                                                                                                                                                                                                                                   |
|----------------------|---------------------------------------------------------------------------------------------------------------------------------------------------------------------------------------------------------------------------------------------------------------------------------------------------------------------------------------------------------------------------------------------------------------------------------------------------------------------------------------------------------------------------------------------------------------------------------------------------------------------------------------------------------------------------------------------------------------------------------------------------------------------------------------------------|
| Numerator            | <p>Patients who received VTE prophylaxis or have documentation why no VTE prophylaxis was given:</p> <ul style="list-style-type: none"> <li>• the day of or the day after ICU admission (or transfer)</li> <li>• the day of or the day after surgery end date for surgeries that start the day of or the day after ICU admission (or transfer)</li> </ul>                                                                                                                                                                                                                                                                                                                                                                                                                                         |
| Data elements        | <ul style="list-style-type: none"> <li>• Anesthesia Start Date</li> <li>• ICU VTE Prophylaxis</li> <li>• ICU VTE Prophylaxis Date</li> <li>• Reason for No VTE Prophylaxis – ICU Admission</li> <li>• Reason for Oral Factor Xa Inhibitor - ICU Admission</li> <li>• Surgery End Date – ICU Admission</li> <li>• Surgical Procedure – ICU Admission</li> </ul>                                                                                                                                                                                                                                                                                                                                                                                                                                    |
| Denominator          | <p>Patients directly admitted or transferred to ICU</p>                                                                                                                                                                                                                                                                                                                                                                                                                                                                                                                                                                                                                                                                                                                                           |
| Excluded populations | <ul style="list-style-type: none"> <li>• Patients less than 18 years of age</li> <li>• Patients who have a hospital length of stay (LOS) &lt; 2 and &gt;120 days</li> <li>• Patients with Comfort Measures Only documented on day of or day after hospital arrival</li> <li>• Patients enrolled in clinical trials</li> <li>• Patients with ICU LOS &lt;1 day without VTE prophylaxis administered and documentation for no VTE prophylaxis</li> <li>• Patients with ICD-9-CM Principal or Other Diagnosis Code of Obstetrics or VTE (defined in Appendix A, Table 7.02, 7.03, or 7.04)</li> <li>• Patients with ICD-9-CM Principal Procedure Code of Surgical Care Improvement Project (SCIP) VTE selected surgeries that start the day of or the day after ICU admission or transfer</li> </ul> |
| Data elements        | <ul style="list-style-type: none"> <li>• Admission Date</li> <li>• Birthdate</li> <li>• Clinical Trial</li> <li>• Comfort Measures Only</li> <li>• Discharge Date</li> <li>• ICD-9-CM Other Diagnosis Codes</li> <li>• ICD-9-CM Principal Diagnosis Code</li> <li>• ICD-9-CM Principal Procedure Code</li> <li>• ICU Admission or Transfer Date</li> <li>• ICU Admission or Transfer</li> <li>• ICU Discharge Date</li> </ul>                                                                                                                                                                                                                                                                                                                                                                     |
